# Supplementary material for: Evolutionary Analysis and Functional Identification of Ancient Brassinosteroid Receptors in Ceratopteris richardii
Source: MDPI journal article supplement (doi:10.3390/ijms23126795), 2022-06-18
Supplement: s1 [file s1]

# Evolutionary analysis and functional identification of ancient brassinosteroids receptors in *Ceratopteris richardii*

Bowen Zheng <sup>1</sup>, Kaixin Xing <sup>1</sup>, Jiaojiao Zhang <sup>1</sup>, Hui Liu <sup>1</sup>, Khawar Ali <sup>1</sup>, Wenjuan Li <sup>1</sup>, Qunwei Bai <sup>1</sup> and Hongyan Ren <sup>1,\*</sup>

A

|              | BRI1 | BRL1/3 | BRL2 | BAK1 | BAS1 | SBI1 | BSU1 | BIN2 | BES1 |
|--------------|------|--------|------|------|------|------|------|------|------|
| Angiosperms  | +    | +      | +    | +    | +    | +    | +    | +    | +    |
| Gymnosperms  | +    | +      | +    | +    | +    | +    | +    | +    | +    |
| Monilophytes |      |        | +    | +    | +    | +    | +    | +    | +    |

B

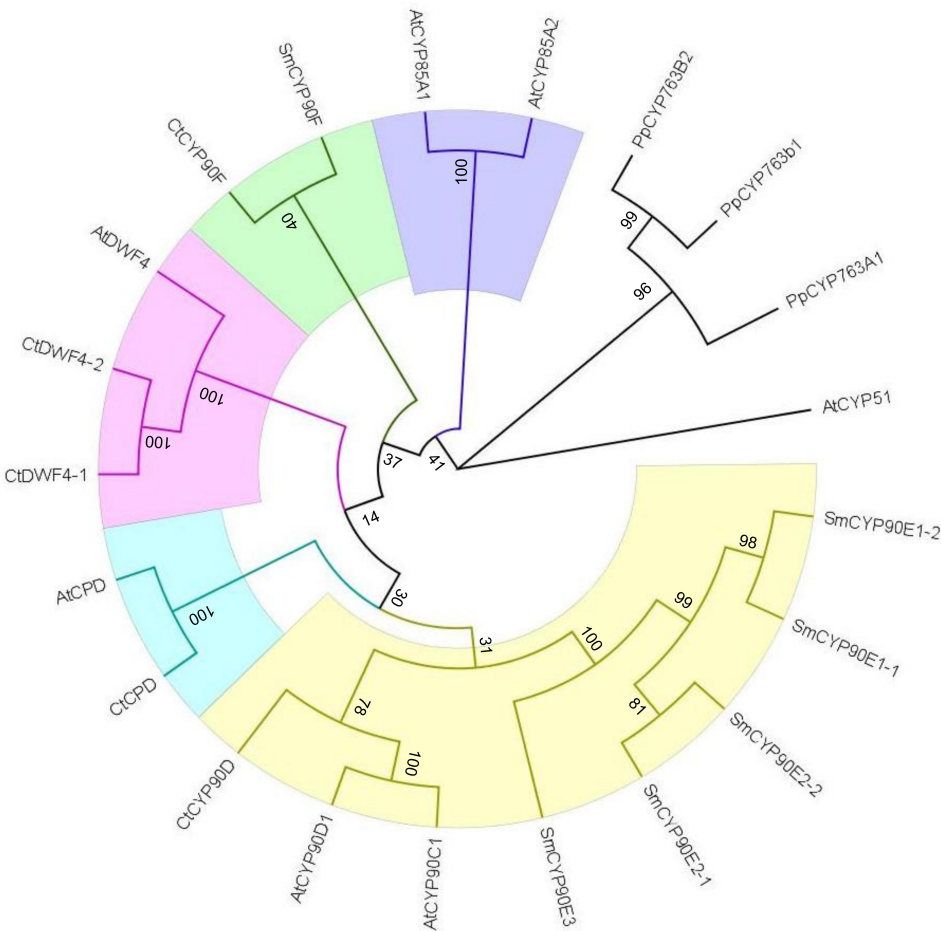

**Figure S1.** Presence of Key components of the BR signaling pathway exist in *Ceratopteris richardii*. (A) The presence of BR receptors (marked by “+”) and main BR signaling components (i.e. BAK1, BSK1, BKI1, BSU1, BIN2 and BES1/BZR1) in plant kingdom obtained by the presence of their transcripts in transcriptomes (B) Phylogenetic tree of the CYP85 family based on the full-length protein sequences. Sequences was aligned using MUSCLE, and the phylogenetic tree was constructed with MEGA7. The tree was generated using the FigTree v.1.4.4. The supporting values were estimated using the SH–Alrt test, and ultrafast bootstrapping with 1000 replicates.

A

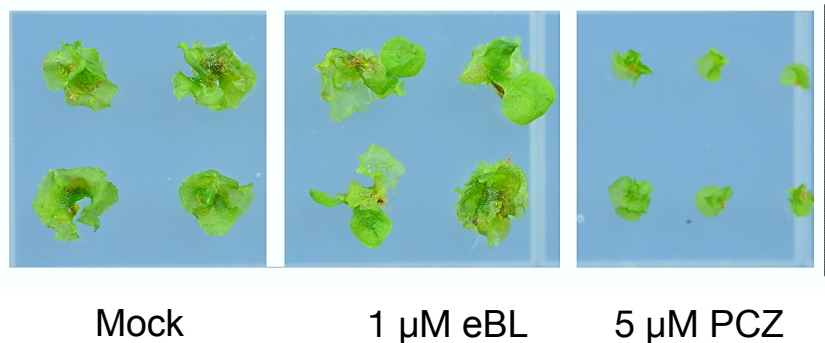

B

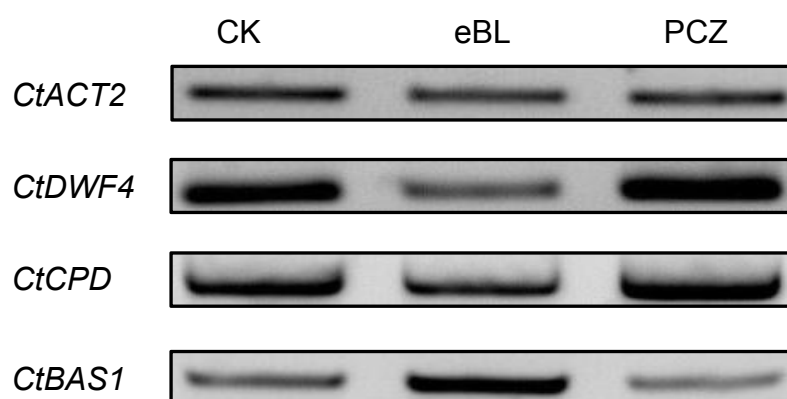

**Figure S2.** The physiological responses to BRs are conserved in *Ceratopteris richardii*. (A) The *Ceratopteris richardii* grown on 1/2 MS medium with 1  $\mu$ M eBL or 5  $\mu$ M PCZ for 50d-old. (B) Semi-quantitative PCR analysis of BR biosynthetic genes *CPD* and *DWF4* and BR catabolic gene *BAS1* in 50-day-old seedlings of *Ceratopteris richardii*, treated with 1  $\mu$ M or 5  $\mu$ M PCZ.

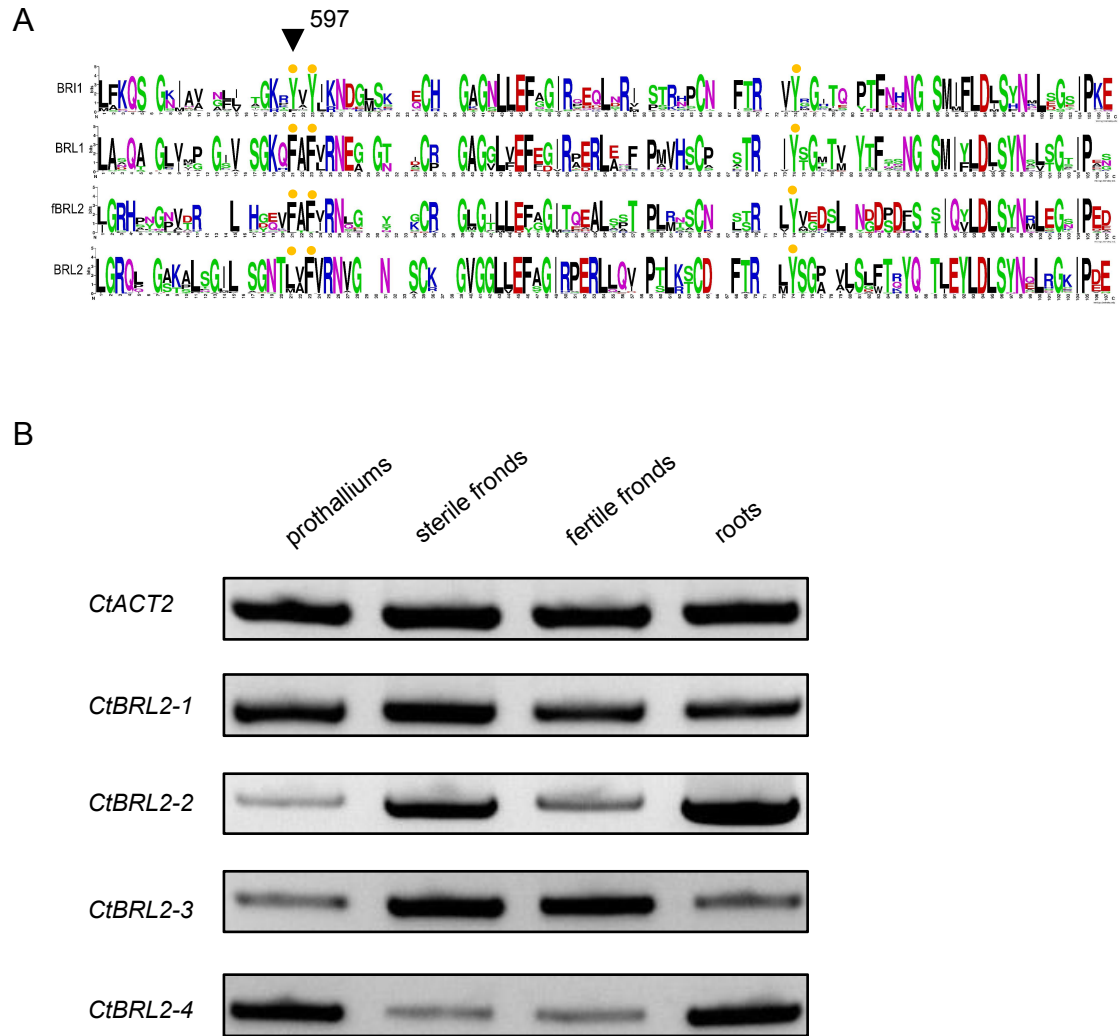

**Figure S3.** The BL interaction residues of fBRL2 are conserved with AtBRL1. (A) The island domain sequences of BRI1, BRL1 and BRL2 in Angiosperms and fBRL2 in ferns, with the key residues that bind to BL highlighted. (B) Semi-quantitative PCR analysis of BR receptors in different tissues of *Ceratopteris richardii*. A representative image from four biological replicates is shown.



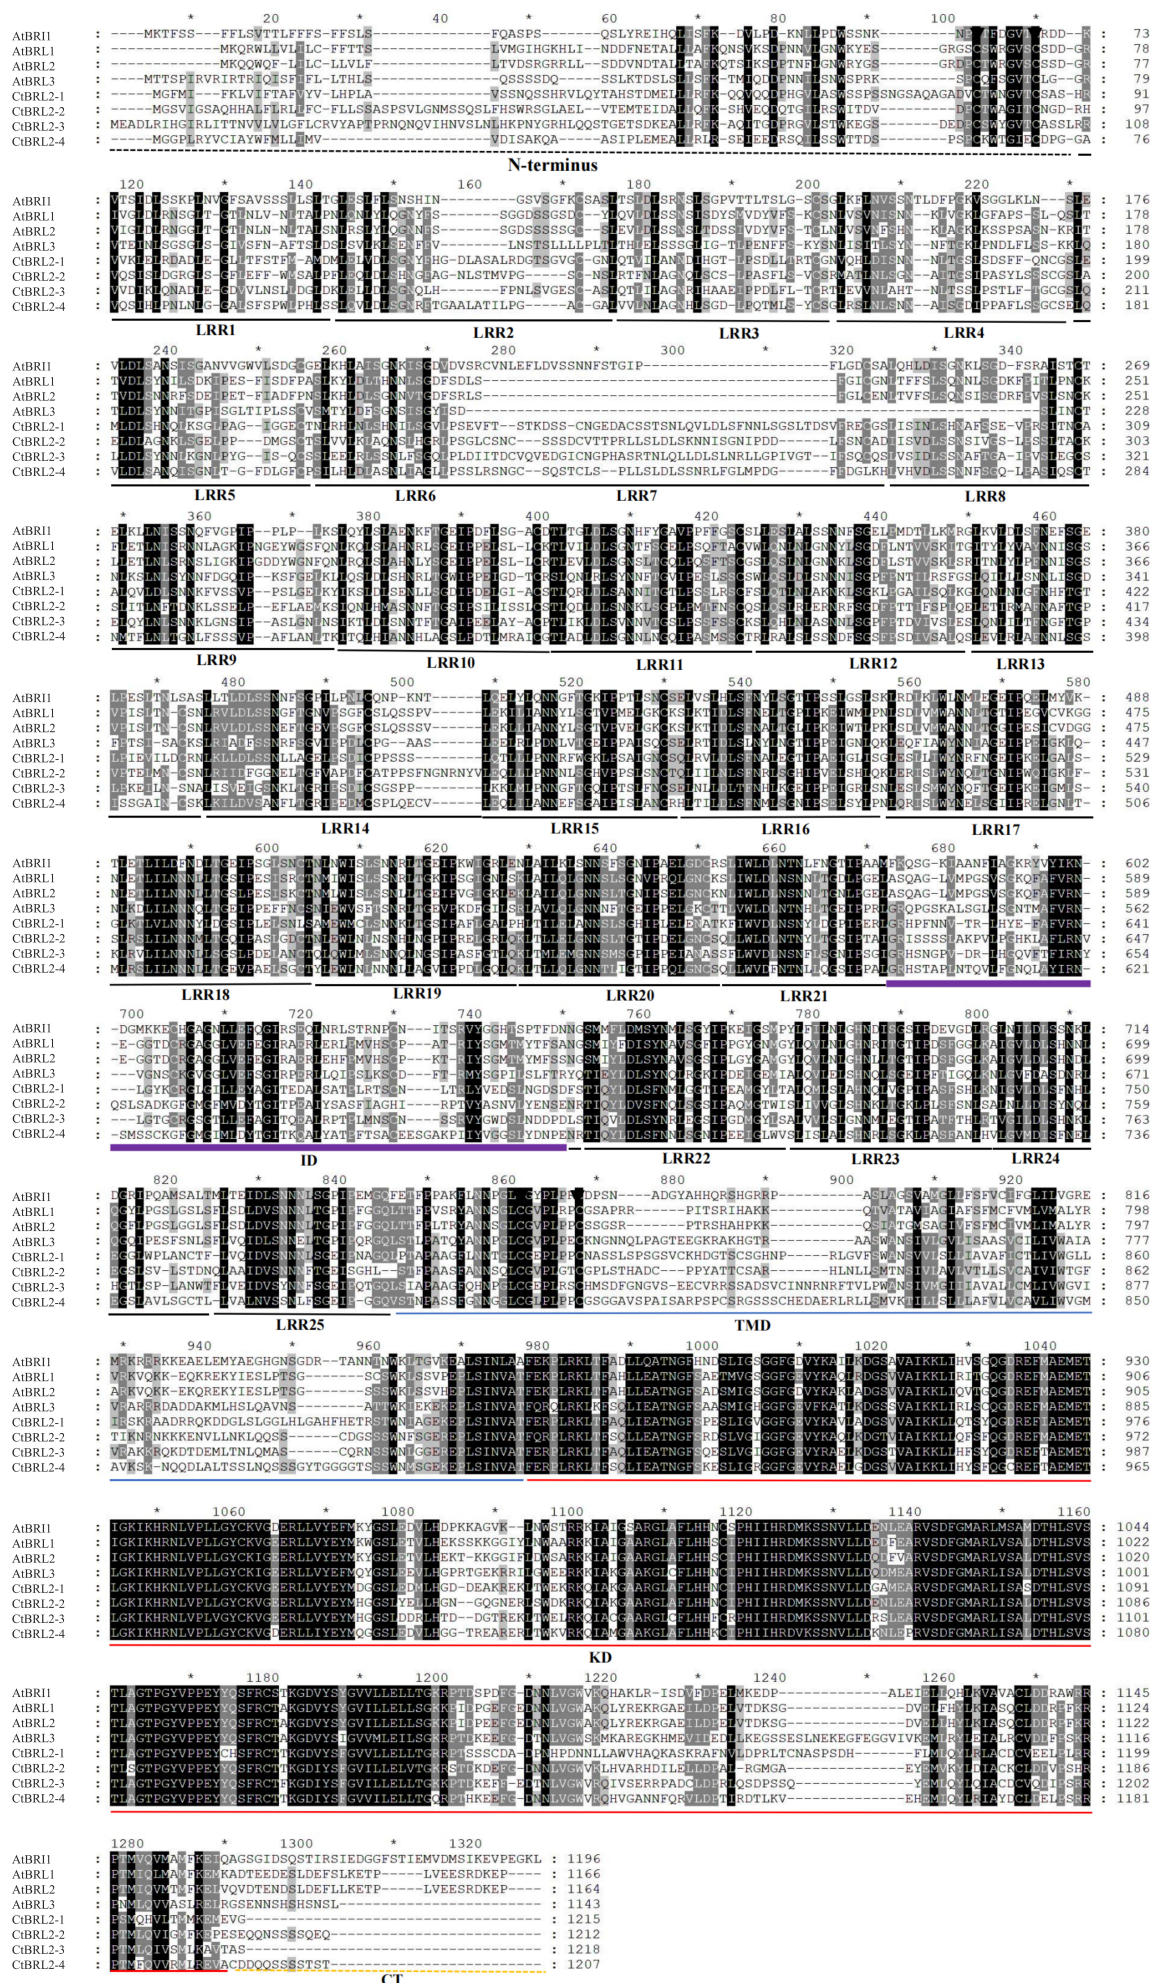

**Figure S4.** Sequence alignments of four CtBRL2, AtBRI1, AtBRL1/3 and AtBRL2. Conserved residues are highlighted with black. "At" and "Ct" represent *Arabidopsis thaliana* and *Ceratopteris richardii*, respectively.



A

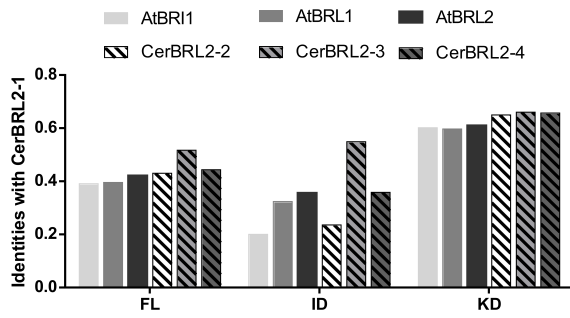

B

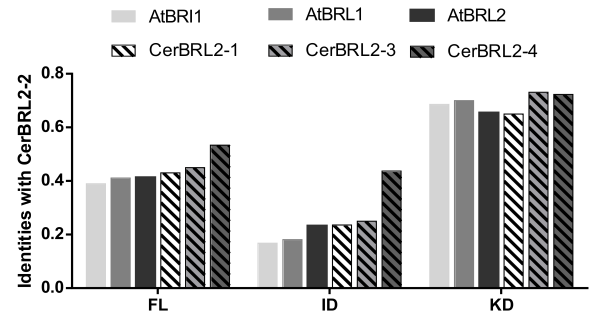

C

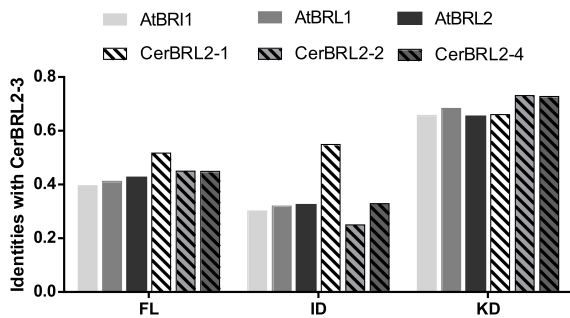

D

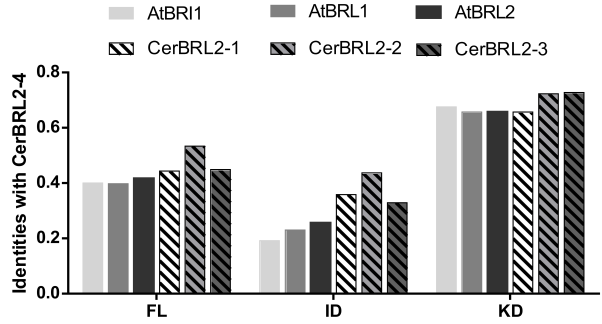

**Figure S5.** Identity analyses of four CtBRL2, AtBRI1 and AtBRL2. FL, full-length receptors; ID, island domain; KD, Kinase domain. (A) Comparison of CtBRL2-1 with BRI1, BRL1 and other three CtBRL2. (B) Comparison of CtBRL2-2 with BRI1, BRL1 and other three CtBRL2. (C) Comparison of CtBRL2-3 with BRI1, BRL1 and other three CtBRL2. (D) Comparison of CtBRL2-4 with BRI1, BRL1 and other three CtBRL2.

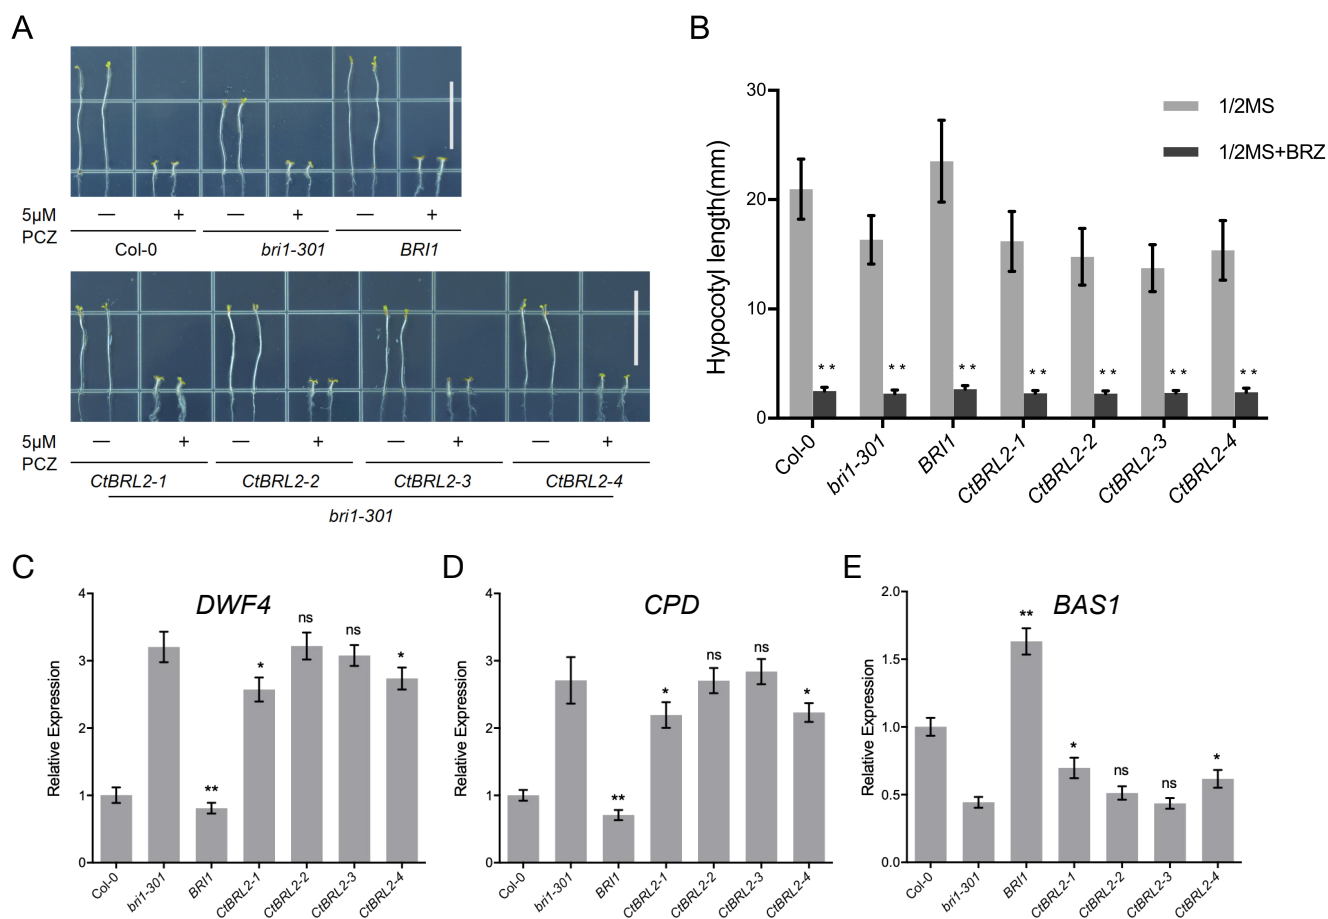

**Figure S6.** Transgenics expression of different *CtBRL2* from *Ceratopteris richardii* does not rescue the phenotype of *Arabidopsis bri1-301* mutants, but does rescue their molecular responses to BR. (A) 5-day-old dark-grown seedlings in 1/2 MS medium with or without 5  $\mu$ M PCZ. Hypocotyl length was plotted as histogram displayed in (B). Scale bar is 1 cm.  $n = 10$  seedlings.  $^{**}P < 0.01$  (two-way ANOVA with Sidak's test). (C-E) Quantitative real-time PCR analysis of BR biosynthetic genes *CPD* and *DWF4* or BR inactivation gene *BAS1* in 4-week-old plants.  $n = 5$  biological replicates.  $^{*}P < 0.05$ .  $^{**}P < 0.01$  (one-way ANOVA with Tukey's test).

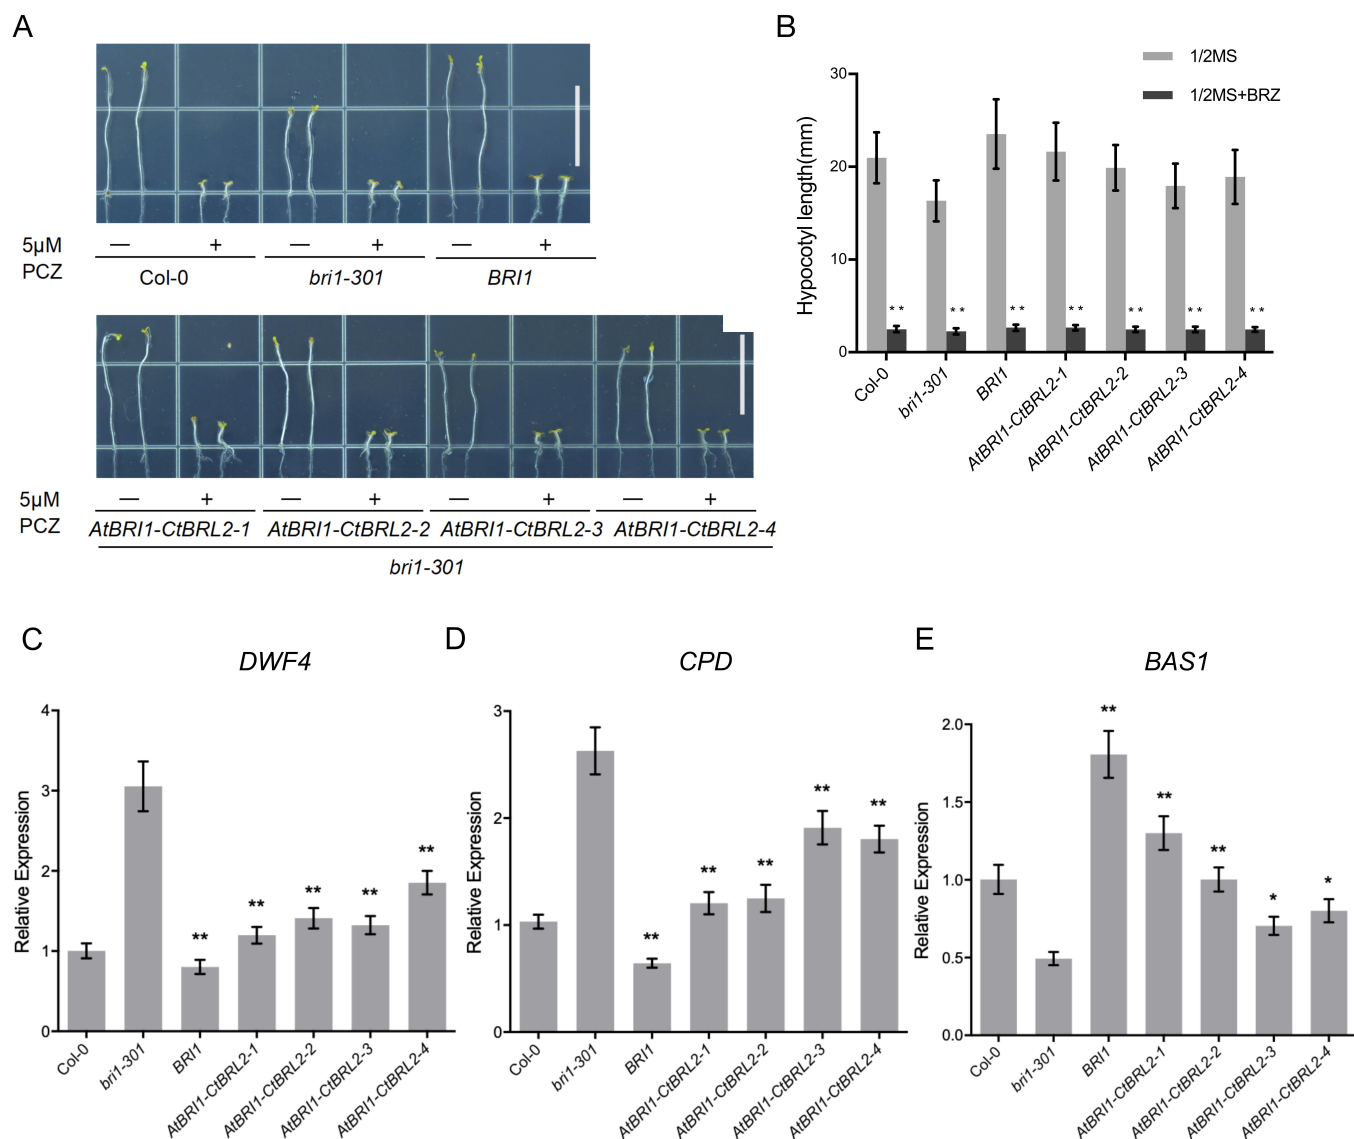

**Figure S7.** Chimeric receptor *AtBRI1-CtBRLs* can partially rescue the phenotype of *bri1-301* mutants. (A) 5-day-old dark-grown seedlings in 1/2 MS medium with or without 5  $\mu$ M PCZ. Hypocotyl length was plotted as histogram displayed in (B). Scale bar is 1 cm.  $n = 10$  seedlings.  $**P < 0.01$  (two-way ANOVA with Sidak's test). (C–E) Quantitative real-time PCR analysis of BR biosynthetic genes *CPD* and *DWF4* or BR inactivation gene *BAS1* in 4-week-old plants.  $n = 5$  biological replicates.  $*P < 0.05$ .  $**P < 0.01$  (one-way ANOVA with Tukey's test).



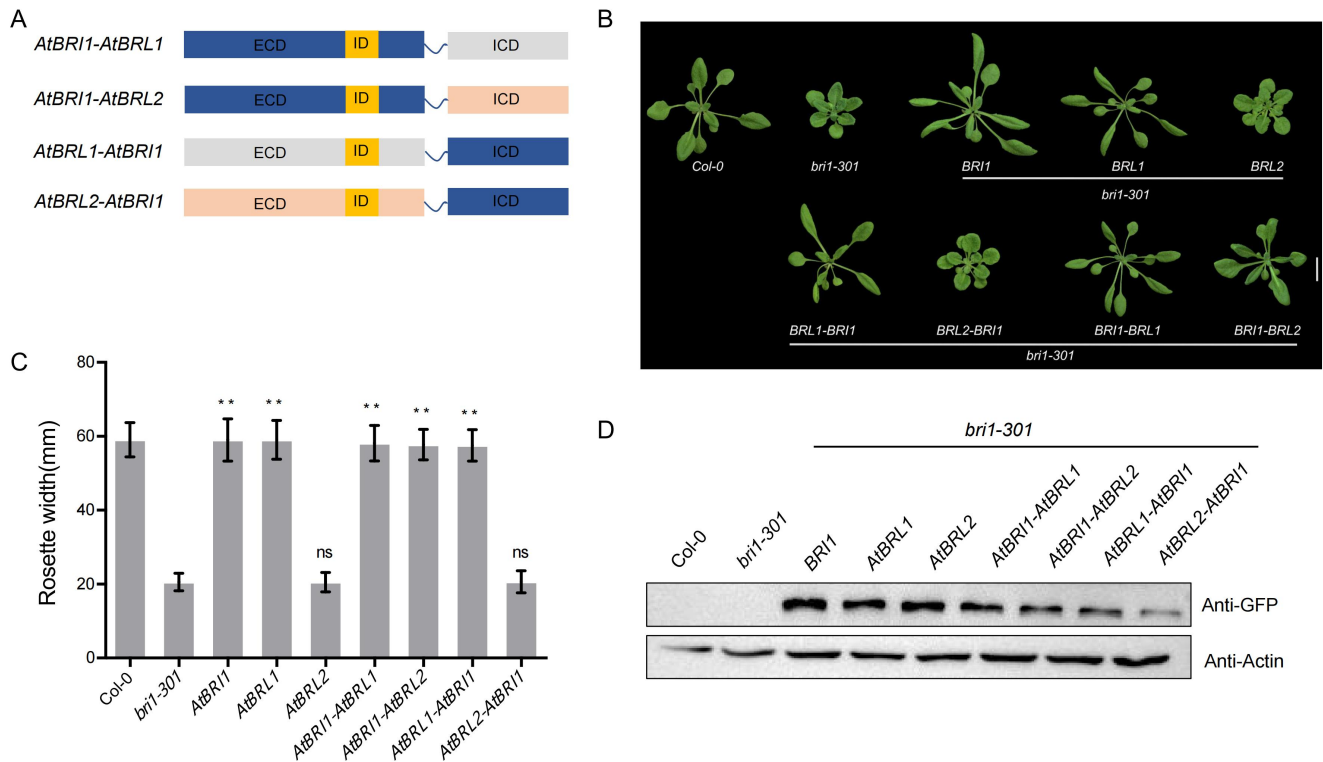

**Figure S8.** In *Arabidopsis thaliana*, the ICD of BRL1, BRL2, and BRL3, and ECD of BRL1 and BRL3 are interchangeable with BRI1. (A) Schematic diagram of the chimeras *AtBRI1-AtBRL1*, *AtBRI1-AtBRL2*, *AtBRL1-AtBRI1*, and *AtBRL2-AtBRI1*. Different receptor fragments are presented in different colors. (B) Phenotypes of 4-week-old transgenic lines expressing *AtBRI1*, *AtBRL1*, *AtBRL2*, *AtBRI1-AtBRL1*, *AtBRI1-AtBRL2*, *AtBRL1-AtBRI1* and *AtBRL2-AtBRI1* under the *AtBRI1* promoter in *bri1-301* background. The scale bar = 1 cm. (C) Quantification of the transgenic lines with the diameter of the rosette leaves in the whole plants grown for 4 weeks, n = 15 plants, \*\* $P < 0.01$ , one-way ANOVA with a Tukey's test. (D) Protein expression levels of ectopic genes with GFP tag in the rosette leaves of the transgenic plants as shown in (B). Actin served as the loading control.

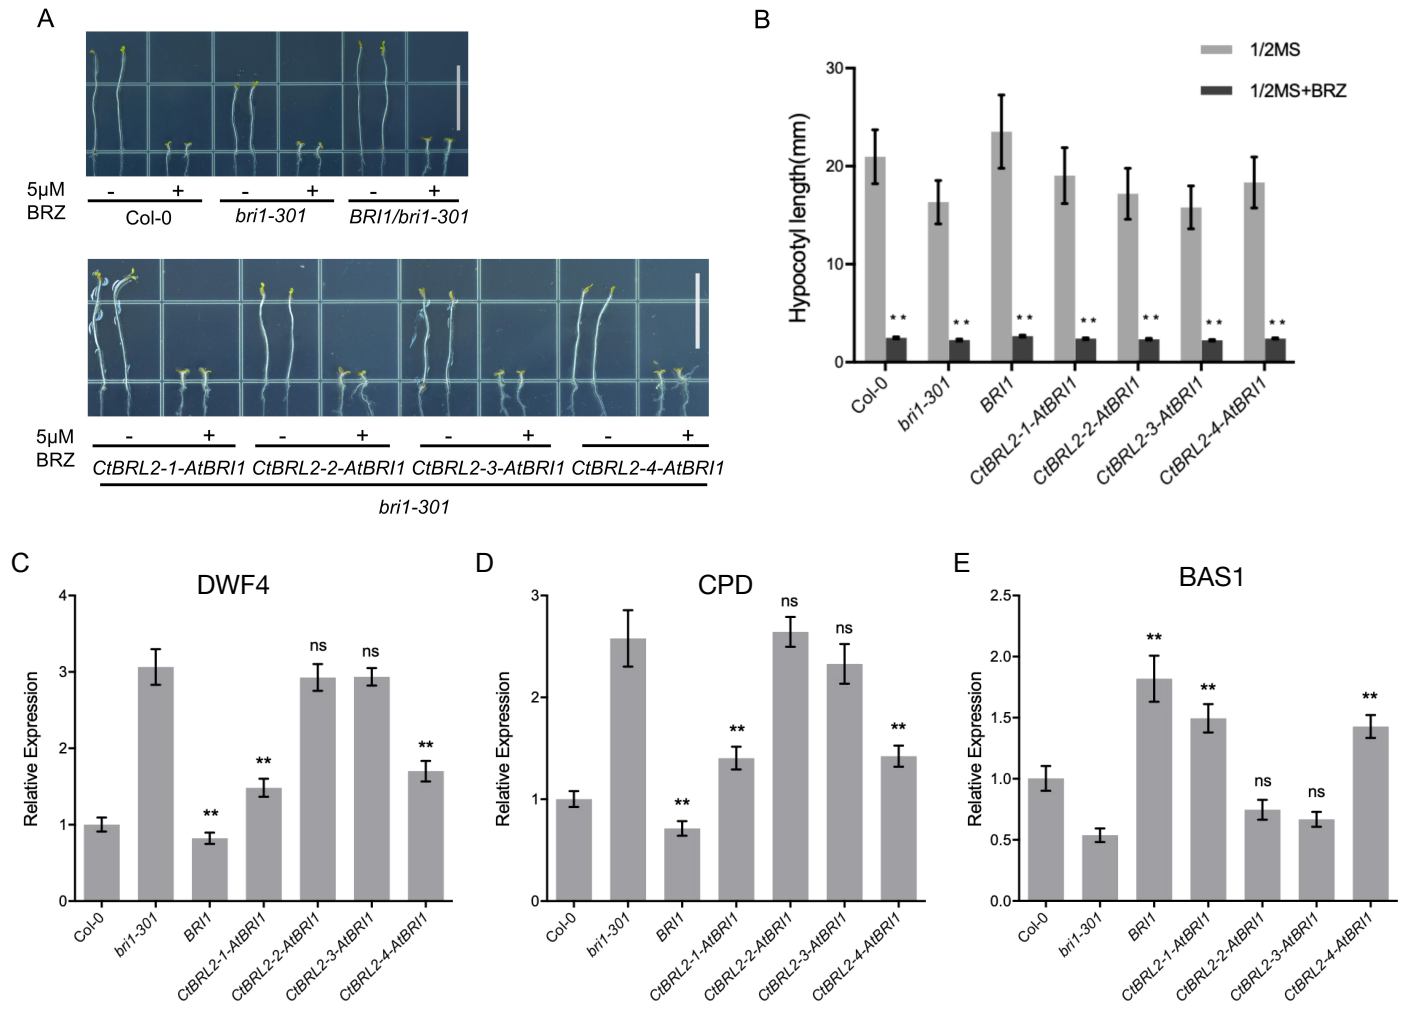

**Figure S9.** Chimeric receptors *CtBRL2-1-AtBRI1* and *CtBRL2-4-AtBRI1* can partially rescue the dwarf phenotype of *bri1-301* mutants. (A) 5-day-old dark-grown seedlings in 1/2 MS medium with or without 5  $\mu$ M PCZ. Hypocotyl length was plotted as histogram displayed in (B). Scale bar =1 cm.  $n = 10$ .  $**P < 0.01$  (two-way ANOVA with Sidak's test). (C-E) Quantitative real-time PCR analysis of BR biosynthetic genes *CPD* and *DWF4* or BR inactivation gene *BAS1* in 4-week-old plants.  $n = 5$  biological replicates.  $*P < 0.05$ .  $**P < 0.01$  (one-way ANOVA with Tukey's test).

A

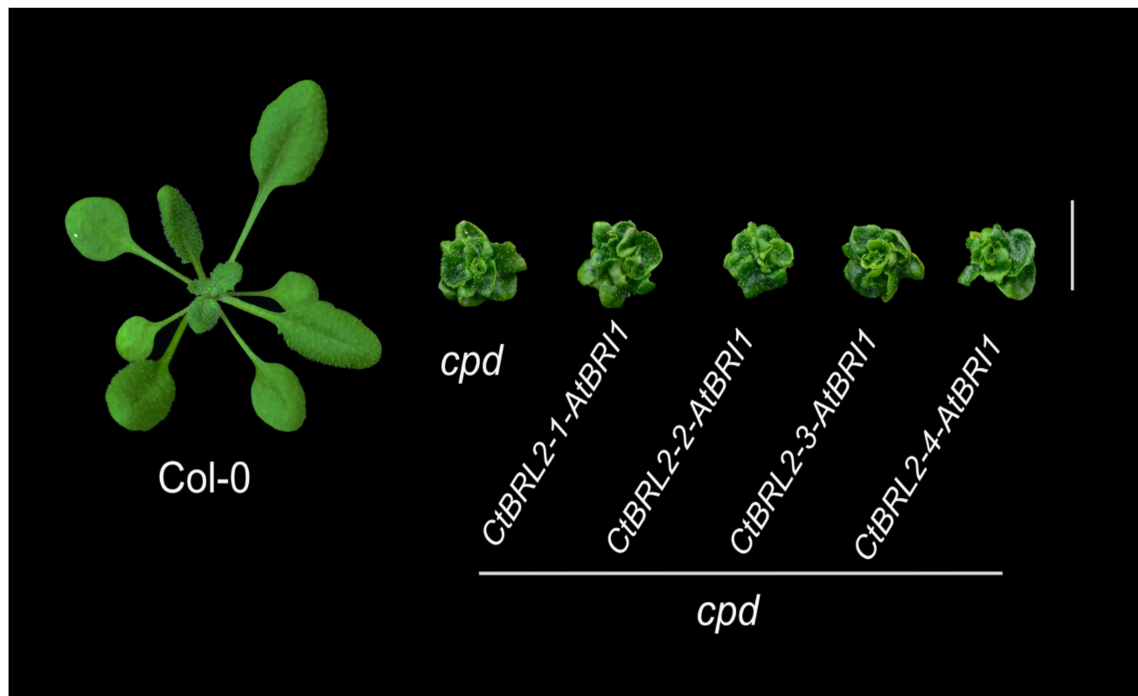

B

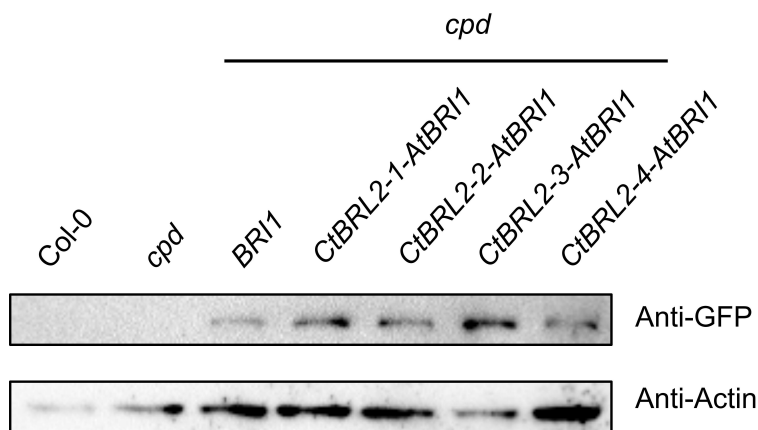

**Figure S10.** Transgenics expression of four *CtBRL2-AtBRI1* does not rescue the phenotype of Arabidopsis *cpd* mutants. (A) Phenotypes of 4-week-old transgenic lines expressing *CtBRL2-1-AtBRI1*, *CtBRL2-2-AtBRI1*, *CtBRL2-3-AtBRI1* and *CtBRL2-4-AtBRI1* under the control of 35S promoter in *cpd* background. The scale bar is 1 cm. (B) Protein expression levels of the transgenes with GFP tag in the rosette leaves of the corresponding plants shown in (A). Actin served as the loading control.



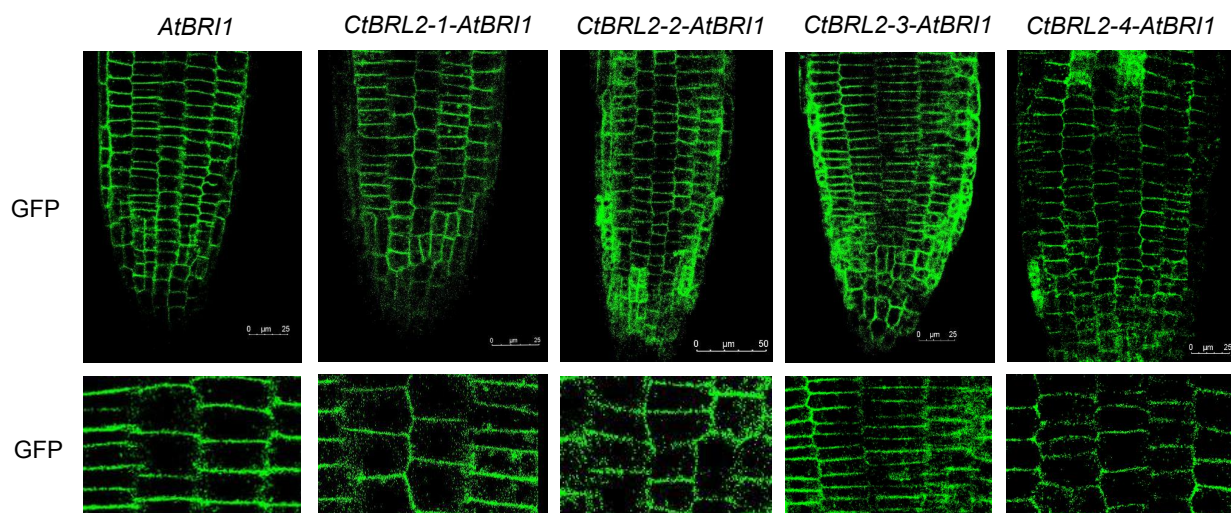

**Figure S11.** Subcellular localization of the four *CtBRL2-AtBRI1*-GFP. Confocal images of root epidermal cells of light-grown 4-day-old seedlings showed that all chimeric receptors were localized at the plasma membrane as *AtBRI1*. Scale bar is 10  $\mu\text{m}$ .

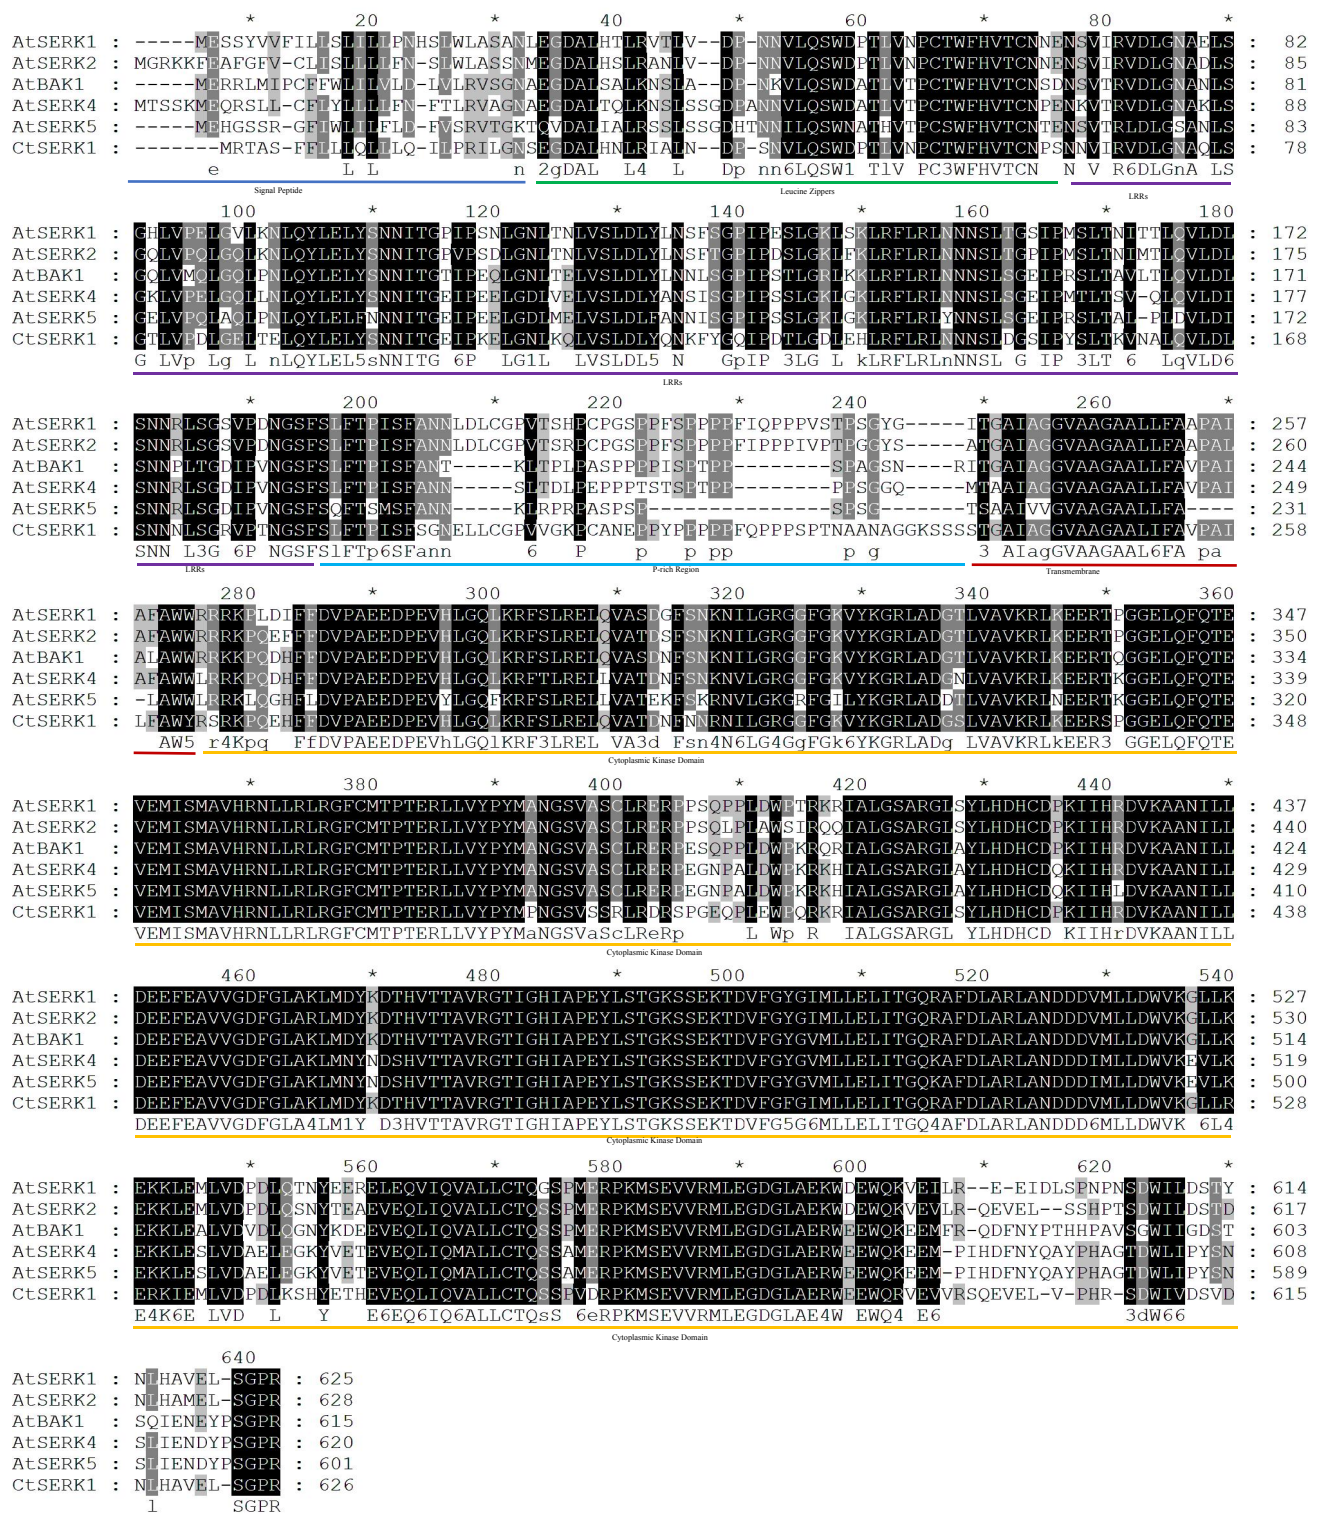

**Figure S12.** Sequence alignments of CtSERK1, and five SERK family genes in *Arabidopsis thaliana*. Conserved residues are highlighted with black. "At" and "Ct" represent *Arabidopsis thaliana* and *Ceratopteris richardii*, respectively.

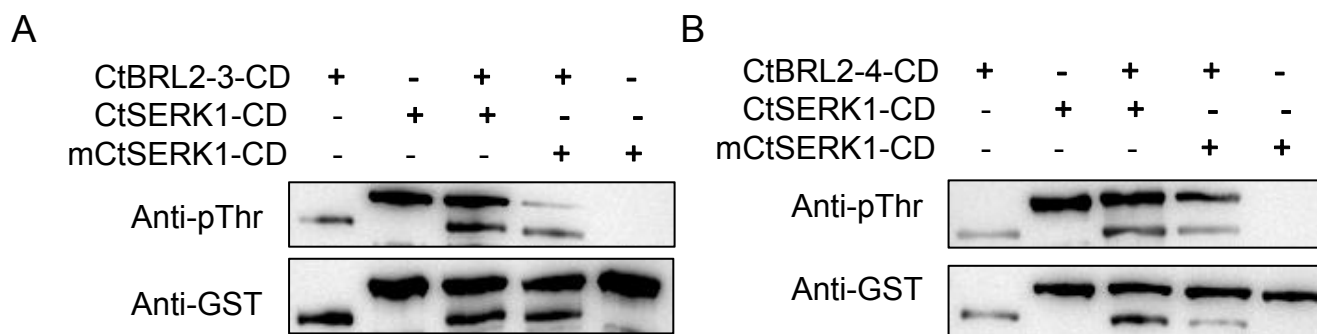

**Figure S13.** The CtSERK1 works as the co-receptor of CtBRL2s. (A,B) CtSERK1-CD and CtBRL2-CD can both autophosphorylate each other. The kinase assays were performed using CtSERK1-CD-GST and CtBRL2-CD-GST. Top panel, Phosphorylation analyzed by pThr antibody. Bottom panel, the GST served as the loading control.



**Table S1** Primers used in cloning, qRT-PCR, and genotyping.

|                       |                                                  |
|-----------------------|--------------------------------------------------|
| Used for gene cloning |                                                  |
| AtBRI1-F-Kpn1         | GCGGTACCATGAAGACTTTTTCAAGCTTCTTTC                |
| AtBRI1-F-BamH1        | CGCGGATCCATGAAGACTTTTTCAAGCTTCTTTC               |
| AtBRI1-R-Sal1         | GCGGTCGACTAATTTTCCTTCAGGAACTTCTT                 |
| AtBRI1-CtBRL2-1-P1    | TATTCGCCCACGACGCTGGTCTCCTT                       |
| AtBRI1-CtBRL2-1-P2    | GGAGACCAGCGTCGTGGGCGAATAGC                       |
| AtBRI1-CtBRL2-2-P1    | TGTTTGTCTATGGACGCTGGTCTCCTTCC                    |
| AtBRI1-CtBRL2-2-P2    | AAGGAGACCAGCGTCCATGACAAAC                        |
| AtBRI1-CtBRL2-3-P1    | TACTATTGGCCCACGGCGCTGGTCT                        |
| AtBRI1-CtBRL2-3-P2    | GGAGACCAGCGCCGTGGGCCAATAGTAT                     |
| AtBRI1-CtBRL2-4-P1    | TTTTGACCATTGACGCTGGTCTCCTTCC                     |
| AtBRI1-CtBRL2-4-P2    | AAGGAGACCAGCGTCAATGGTCAAAACC                     |
| CtBRL2-1-F-Sma1       | TCCCCGGGCTTGCCATGGGGTTCATGATC                    |
| CtBRL2-1-R-Sal1       | GTCGTCGACTAAGCCTACCTCCATTTCTTCAT                 |
| CtBRL2-1-AtBRI1-P1    | AGCAAGGGAAAACACACCCAATCGCGGGTT                   |
| CtBRL2-1-AtBRI1-P2    | CGATTGGGTGTGTTTTCCCTTGCTGGT                      |
| CtBRL2-2-F-Kpn1       | CGGGGTACCATAATCATGGGCTCCGTTATTG                  |
| CtBRL2-2-R-Sal1       | GTCGTCGACCAATTGTTCTTGACTGCTAGAG                  |
| CtBRL2-2-AtBRI1-P1    | ACACTACCAGCAAGGGAAAGCAAATT                       |
| CtBRL2-2-AtBRI1-P2    | TGAATTTGCTTTCCCTTGCTGGTAGTGT                     |
| CtBRL2-3-F-Sma1       | TCCCCGGGATGGAAGCGGATCTGAGAATCCATG                |
| CtBRL2-3-R-Sal1       | CGTCGACTCTGGAAGCTGTGACTGCCTTTAGC                 |
| CtBRL2-3-AtBRI1-P1    | AGCAAGGGAGAGCACCGTGAATCGGTTTCCT                  |
| CtBRL2-3-AtBRI1-P2    | GGAACCGATTACGGTGCTCTCCCT                         |
| CtBRL2-4-F-Kpn1       | CGGGGTACCCTTTCTCCTCACTGATATG                     |
| CtBRL2-4-R-Sal1       | GTCCGTCGACTCAAGTACTGGTTGAACTAC                   |
| CtBRL2-4-AtBRI1-P1    | CTACCAGCAAGGGAGAGGAGACGAAGTC                     |
| CtBRL2-4-AtBRI1-P2    | GACTTCGTCTCCTCTCCCTTGCTGGTAG                     |
| CtSERK1-CD-HIS-F      | cagcaaatgggtcgcggtaccGCTGCATTGATATTTGCAGTACCT    |
| CtSERK1-CD-HIS-R      | tgcggcgcaagcttgtagacTCTTGACCTGAAAGCTCAACTG       |
| CtBRL2-1-CD-F         | gatctggtccgcgtggatccAAGAGGGCTGCTGATCGAAGG        |
| CtBRL2-1-CD-R         | gatgcggccgctcgagtcgacGCCTACCTCCATTTCTTCATCA      |
| CtBRL2-2-CD-F         | gatctggtccgcgtggatccATAAAAAACAGAAACAAGAAGAAGGAGA |
| CtBRL2-2-CD-R         | gatgcggccgctcgagtcgacTTGTTCTTGACTGCTAGAGCTGTTC   |
| CtBRL2-3-CD-F         | gatctggtccgcgtggatccGCTGTTGCACTGCTATGCATG        |
| CtBRL2-3-CD-R         | gatgcggccgctcgagtcgacGGAAGCTGTGACTGCCTTTAGC      |
| CtBRL2-4-CD-F         | gatctggtccgcgtggatccAGCAGCTTGAATCAGTCCTCAAG      |
| CtBRL2-4-CD-R         | gatgcggccgctcgagtcgacAGTACTGGTTGAACTACTGCTTTGTTG |
| AtBRI1-CD-F           | gatctggtccgcgtggatccGGTAGAGAGATGAGGAAGAGACGG     |
| AtBRI1-CD-R           | gatgcggccgctcgagtcgacTAATTTCTTCAGGAACTTCTTTTATAC |
| CtSERK1-CD-F-Kpn1     | acgggggacgagctcggtaccATGCGGACGGCTTCATTTT         |

|                         |                                                |
|-------------------------|------------------------------------------------|
| CtSERK1-CD-R-SalI       | ttctcctttactcatgtcgacCTATCTTGGACCTGAAAGCTCAACT |
| mCtSERK1-317-F          | GGGTTCGGTGAAGTTTACAAAGGG                       |
| mCtSERK1-317-R          | CCCTTTGTAAACTTCACCGAACCC                       |
| Used for RT and qRT PCR |                                                |
| CtBRL2-1-RT-F           | tgtagaaggagagatccctAAAGAACTAGGGGCTCTTTC        |
| CtBRL2-1-RT-R           | atgtttaaacctcttagatcGCTAAAGCTTGCTGGGATAG       |
| CtBRL2-2-RT-F           | gatctgggtccgcgtggatccCCTCTATCCACGCATGCAGAT     |
| CtBRL2-2-RT-R           | gatcgggcccgcctcagatcgacGAACATGCCTATGACTTGCAGC  |
| CtBRL2-3-RT-F           | tgtagaaggagagatccctAAAGAAATTGGGATGCTCTCC       |
| CtBRL2-3-RT-R           | atgtttaaacctcttagatcGGTAAAAGTAGCTGGGATGG       |
| CtBRL2-4-RT-F           | tgtagaaggagagatccctAGGGAGCTCGGCAACCTCAC        |
| CtBRL2-4-RT-R           | atgtttaaacctcttagatcGGCGAAGCTCGCTGGTAATT       |
| CtBRL2-1-qRT-F          | TGATGAGGCGAAGAGGGAGA                           |
| CtBRL2-1-qRT-R          | AGCTATGGCAGTATTCGGGC                           |
| CtBRL2-2-qRT-F          | AGAACCCCTGAGCATCAACG                           |
| CtBRL2-2-qRT-R          | CAAAGCCTCCAATGCCAACC                           |
| CtBRL2-3-qRT-F          | TTCGGAAGAGTGTGTCAGGC                           |
| CtBRL2-3-qRT-R          | CATCGGTGTCCTTCTGCCTT                           |
| CtBRL2-4-qRT-F          | AGAATTTGGAGCCGAGGGTG                           |
| CtBRL2-4-qRT-R          | TCCAAGATGACGACGCCAAA                           |
| CtCPD-qRT-F             | CTCGTTTCTGCCCTGGTCAT                           |
| CtCPD-qRT-R             | GCGCGTTGTGGGGAAAAATA                           |
| CtCPD-RT-F              | CCAGTTACCCTATGTCGCTTGA                         |
| CtCPD-RT-R              | GCCCATTTCTGAGGGTTTCATT                         |
| CtDWF4-qRT-F            | TTCTACAGCCCCATTCAGCG                           |
| CtDWF4-qRT-R            | CATGCGTTTGTGCTCTTCCC                           |
| CtDWF4-RT-F             | GCGGCCATGGCCATTCTCTTG                          |
| CtDWF4-RT-R             | GAATCTGTTTGGCCATGAGGT                          |
| CtACT2-qRT-F            | ATGCTCCAGCCATGTACGTAG                          |
| CtACT2-qRT-R            | CATAACCCTCATAGATAGGA                           |
| CtACT2-RT-F             | ATGCTCCAGCCATGTACGTAG                          |
| CtACT2-RT-R             | TGGCCCAGATTCATCATACTC                          |
| CtBAS1-qRT-F            | GCAAAAACCATCTTATATTATA                         |
| CtBAS1-qRT-R            | CACATCAGGAAAATGCTGGTAG                         |
| CtBAS1-RT-F             | TCTAATGTGGTGCTTGATAAT                          |
| CtBAS1-RT-R             | GGCAGGAGCGTTAAGGTCACA                          |
| AtCPD-qRT-F             | GCAATGACGGATGTTGAGAT                           |
| AtCPD-qRT-R             | CAAGGGTTGAAAGTGCGAGC                           |
| AtCPD-RT-F              | GTTCTTATCCTGCTTCCATTTG                         |
| AtCPD-RT-R              | AGCCACTCGTAGCGTCTCATT                          |
| AtDWF4-qRT-F            | AACAGACGATGATCTTTTGGG                          |
| AtDWF4-qRT-R            | CTTCAACGGCTTTAGGGCAA                           |
| AtDWF4-RT-F             | CGAAGGAAGGCTCTTTGAATG                          |

|                     |                           |
|---------------------|---------------------------|
| AtDWF4-RT-R         | CTTCAACGGCTTTAGGGCAA      |
| AtBAS1-qRT-F        | GCCAAATTGACACTCGCTGTAA    |
| AtBAS1-qRT-R        | GACGGTAGGTGCATGCTGATAA    |
| AtBAS1-RT-F         | GTTCAGGACATTGTGGAGGAG     |
| AtBAS1-RT-R         | GGATAAAGCAACATAAGGACG     |
| AtACT2-qRT-F        | ACTCTCCCGCTATGTATGTCG     |
| AtACT2-qRT-R        | AGAAACCCTCGTAGATTGGC      |
| AtACT2-RT-F         | ACTCTCCCGCTATGTATGTCG     |
| AtACT2-RT-R         | TGGACCTGCCTCATCATACTC     |
| Used for genotyping |                           |
| bri1-116-F          | TGGCGAGTTACCGATGGATACG    |
| bri1-116-R          | CTCTTAGATCACCTACCTCATCAGG |
| cpd-F               | TTTCTTTCTCTCCGCTCCTTC     |
| cpd-R               | CTACTCCGCCGTACACGTTAC     |
